# Supplementary material for: Doxorubicin conjugated functionalizable carbon dots for nucleus targeted delivery and enhanced therapeutic efficacy
Source: Royal Society of Chemistry journal article supplement (doi:10.1039/c6nr00247a), 2016-01-01
Supplement: c6nr00247a1.pdf [file c6nr00247a1.pdf]

## Supporting Information

### **Doxorubicin conjugated functionalizable carbon dots for nucleus targeted delivery and enhanced therapeutic efficacy**

Lei Yang,<sup>a</sup> Zheran Wang,<sup>b</sup> Ju Wang,<sup>a</sup> Weihua Jiang,<sup>a</sup> Xuewei Jiang,<sup>c</sup> Zhaoshi Bai,<sup>c</sup>

Yunpeng He,<sup>a</sup> Jianqi Jiang,<sup>a</sup> Dongkai Wang\*<sup>a</sup> and Li Yang\*<sup>a</sup>

<sup>a</sup> Department of Pharmaceutics, School of Pharmacy, Shenyang Pharmaceutical University, Shenyang 110016, P.R. China

<sup>b</sup> Department of Chemistry, University of the Cumberland, 7000 College Station Drive, Williamsburg, KY 40769, USA

<sup>c</sup> Department of Pharmacology, Shenyang Pharmaceutical University, Shenyang 110016, P.R. China

Corresponding author:

Dongkai Wang, E-mail: wangycsyphu@126.com; Tel.: +86-24-23986310.

Li Yang, E-mail: pharm305@126.com; Tel.: +86 24 2398 6349.

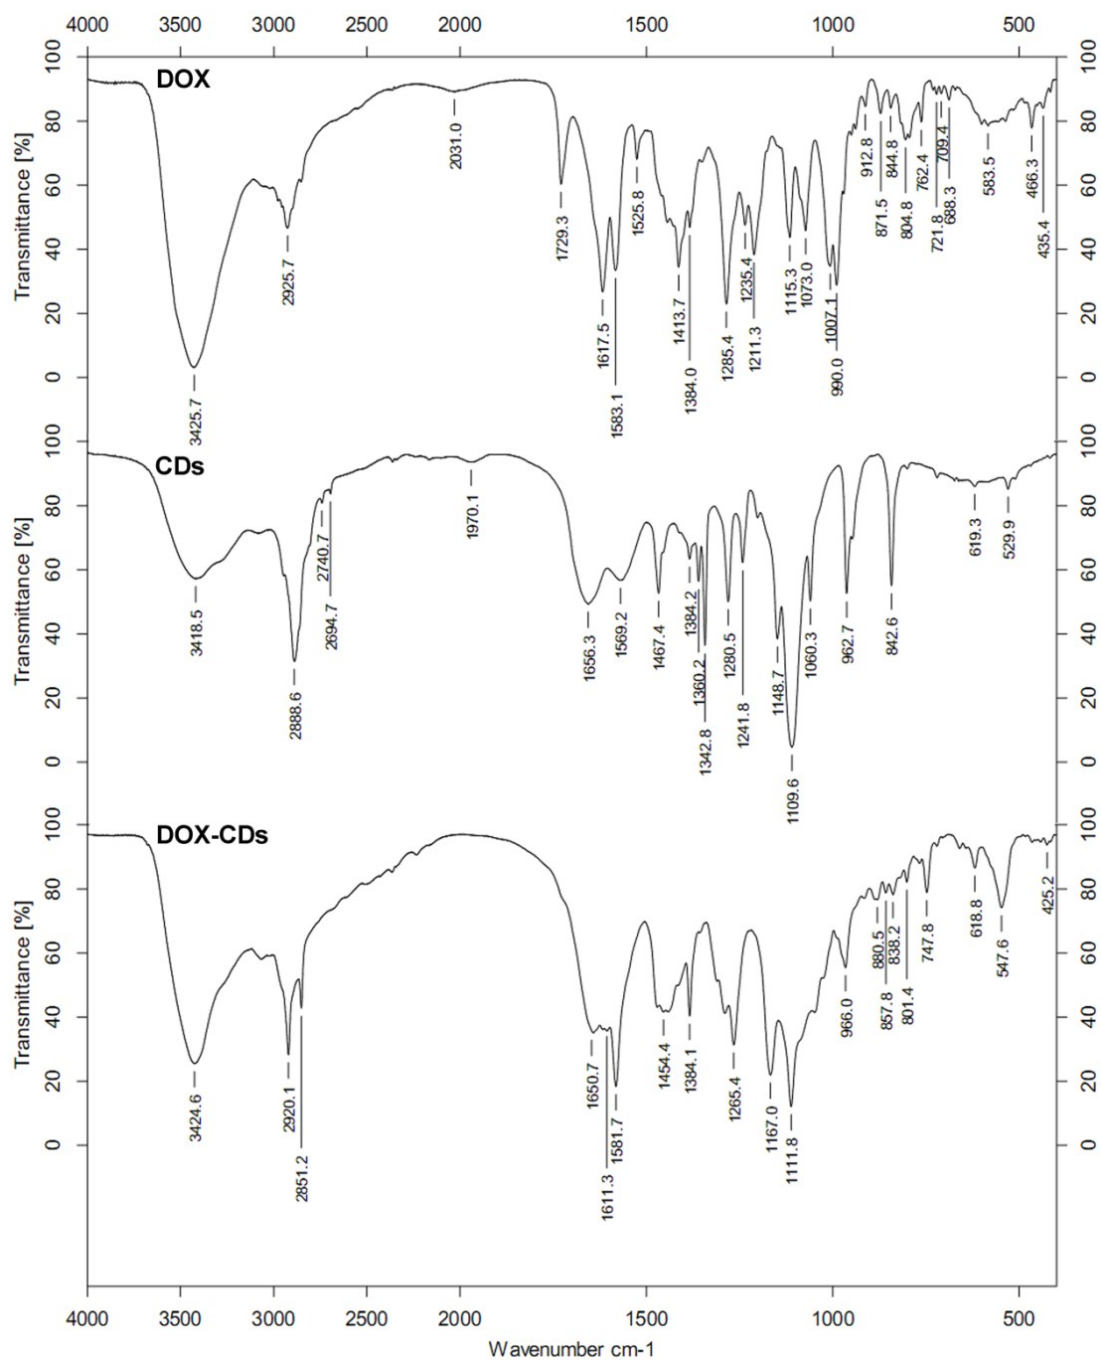

**Fig.S1** FT-IR spectra of DOX, CDs and DOX-CDs.

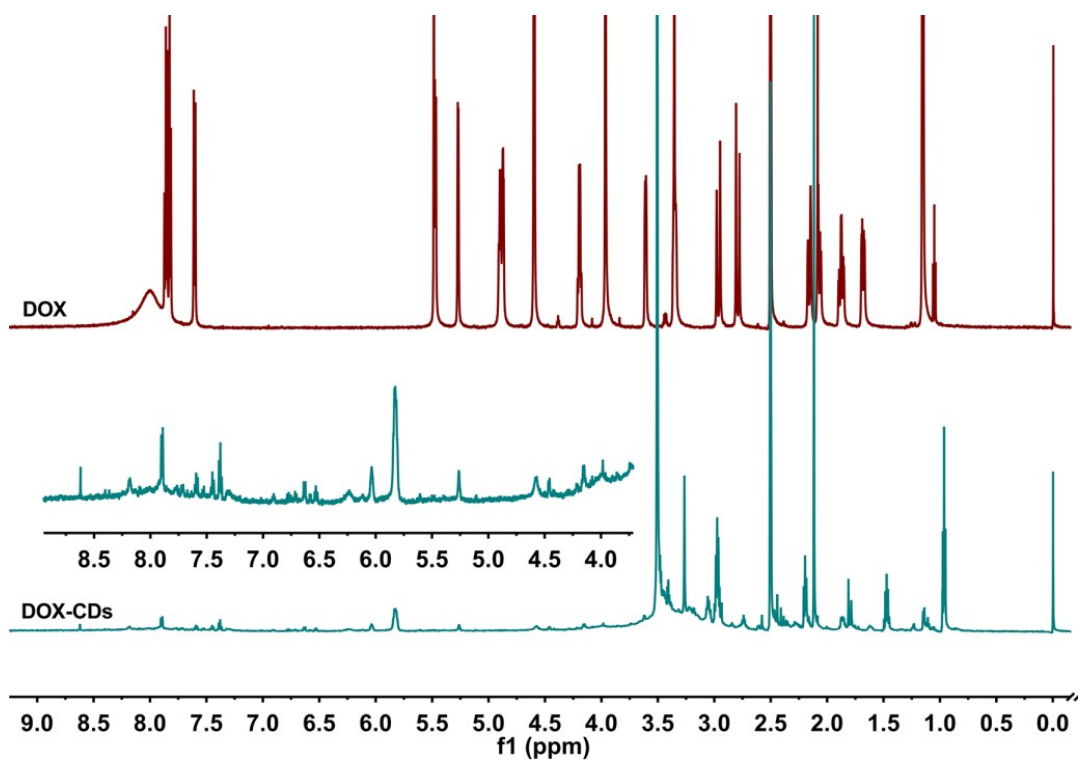

**Fig.S2** <sup>1</sup>H NMR spectra of DOX and DOX-CDs.
